# Supplementary material
Source: PubMed Central journal article supplement (PMC9977608)
Supplement: NIHMS1872654-supplement-supinfo.pdf [file NIHMS1872654-supplement-supinfo.pdf]

Supplemental Figures

Western blot comparison of expression levels of Flag-EFGR vs Flag-Npu<sup>C</sup>-EGFR.....2  
Optimization of HA-Ava<sup>N</sup> concentration in intein splicing.....3  
Full view of immunofluorescence of HA-Ava<sup>N</sup> splicing .....4  
Uncropped, unedited Figure 2B.....5  
Expressed Protein Ligation of TMR-HA-Ava<sup>N</sup>.....6  
TMR spliced EGFR mimics recombinant HA-Ava<sup>N</sup> spliced EGFR.....7

**Supplemental Figure 1**

Western blot comparison of membrane expression levels of Flag-EGFR vs Flag-Npu<sup>C</sup>-EGFR

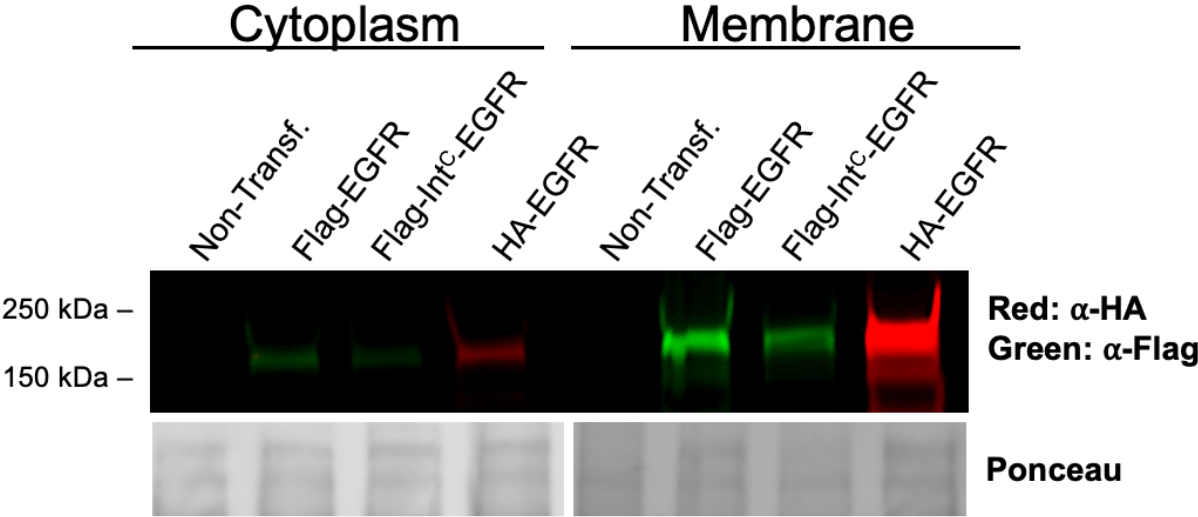

HEK293T cells were transfected with the different EGFR constructs (Flag-EGFR, Flag-Int<sup>C</sup>-EGFR, and HA-EGFR). The cytoplasm and membrane fractions were isolated and analyzed by western analysis (anti-Flag – green, anti-HA – red, Ponceau – loading control).

## Supplemental Figure 2

Optimization of HA-Ava<sup>N</sup> concentration in intein splicing

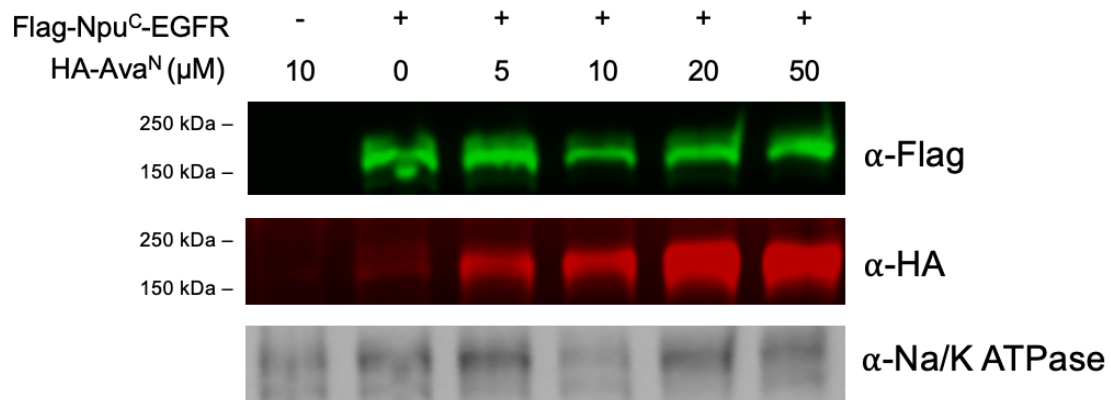

HEK293T cells were transfected with Flag-Npu<sup>C</sup>-EGFR and treated with increasing concentrations of HA-Ava<sup>N</sup> (0-50 mM) for 1 hour. The membrane fractions were isolated and analyzed by western blot (anti-Flag – green, anti-HA – red, Na/K ATPase – membrane fraction loading control).

### Supplemental Figure 3

Full view immunofluorescence of HA-Ava<sup>N</sup> splicing.

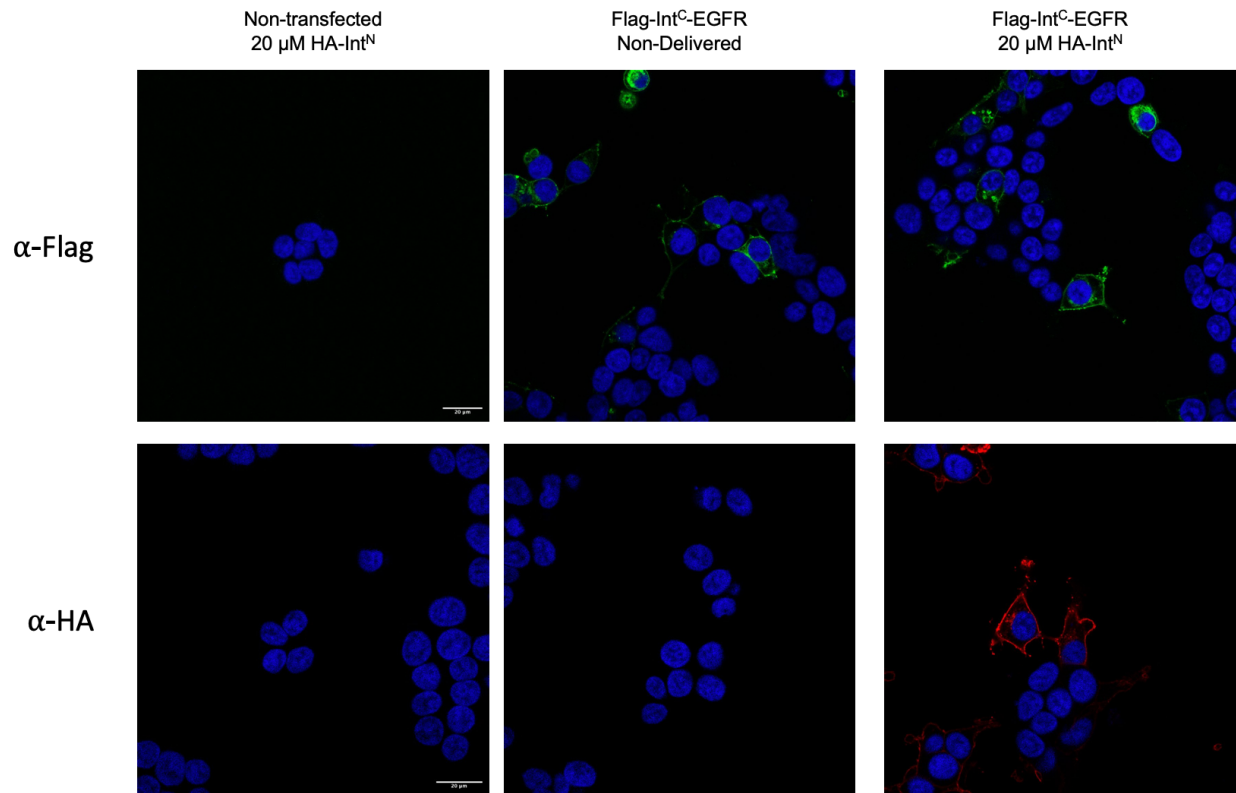

Immunofluorescence HEK293T cells transfected with Flag-Npu<sup>C</sup>-EGFR and incubated with HA-Ava<sup>N</sup>. Cells were fixed with paraformaldehyde and then stained with either anti-Flag (green) or anti-HA (red) and DAPI (blue) followed by confocal imaging.

**Supplemental Figure 4**  
Uncropped, unedited Figure 2B

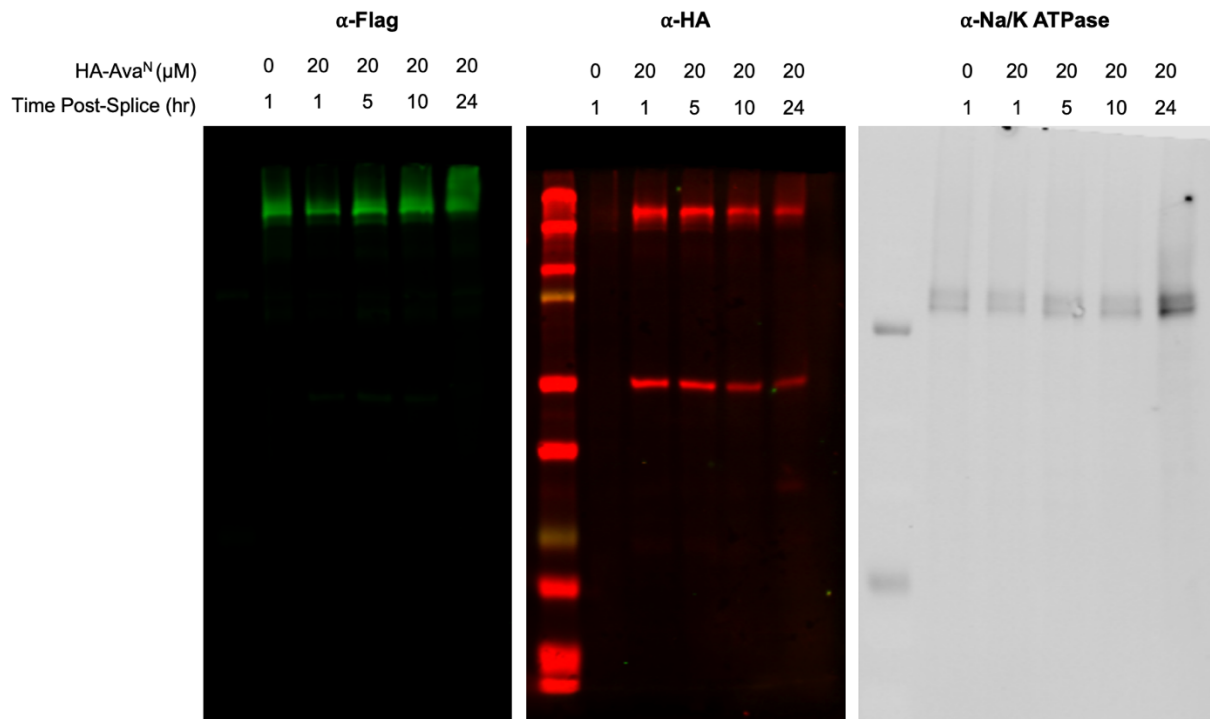

HEK293T cells were transfected with Flag-Npu<sup>C</sup>-EGFR and then treated with 20  $\mu$ M of HA-Ava<sup>N</sup> for 1 hr. Cells were then harvested at the indicated time points post splicing and the membrane fraction was extracted and analyzed by western blot (anti-Flag – green, anti-HA – red, anti-Na/K ATPase – gray scale)

**Supplemental Figure 5**  
Expressed Protein Ligation of TMR-HA-Ava<sup>N</sup>

**A**

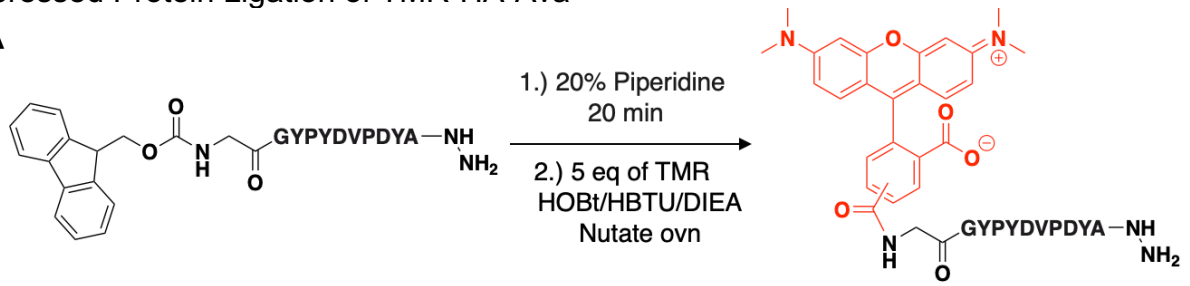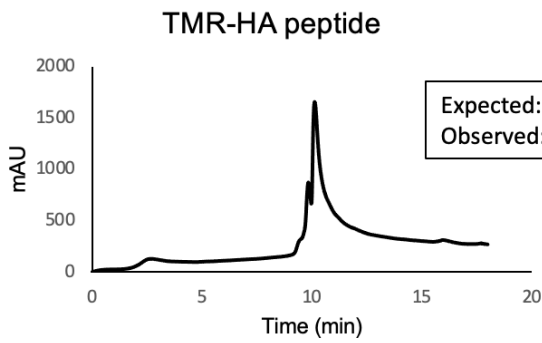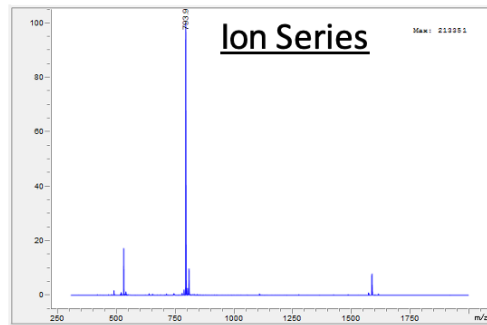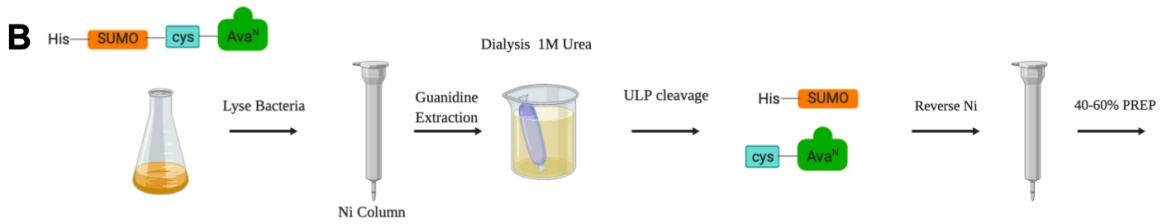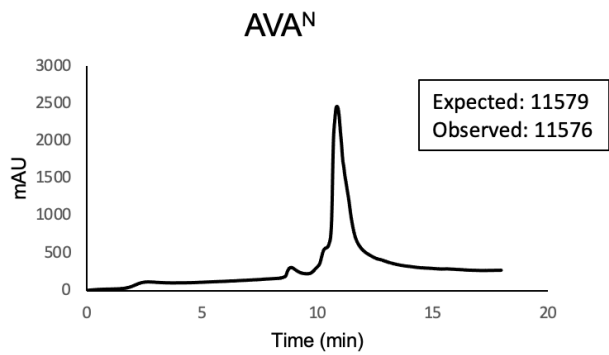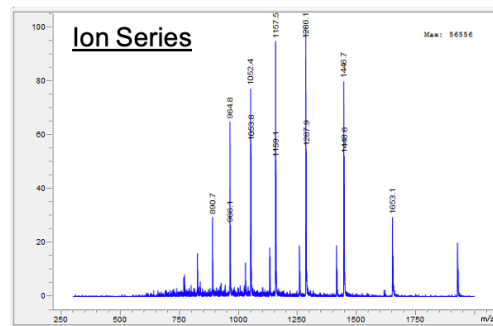

**C**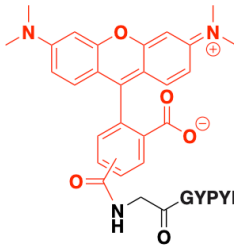

- 1.) NaNO<sub>2</sub> (10mM), pH 3, -15 °C, 15min
- 2.) MPAA (100mM), pH 7, RT, 45min
- 3.) 0.1 eq cys-AVA, pH 7.8

6M guan, 300mM PO<sub>4</sub>buffer

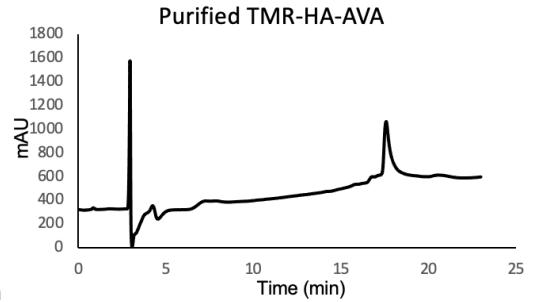

Expected: 13131 Observed:13132

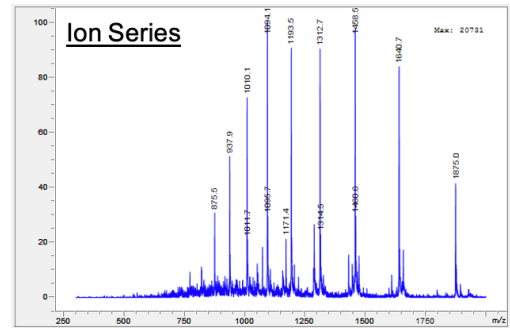

**A)** Synthesis of TMR-HA peptide. The HA peptide was synthesized via F-moc based solid phase peptide synthesis, followed by a coupling of the TMR fluorophore to the N-terminal glycine. Representative Liquid-Chromatography/Mass-Spectrometry chromatogram (measured at 214nm) and Ion Series of purified peptide are presented. **B)** Purification of Ava<sup>N</sup> with N-terminal cysteine. Representative LCMS (214nm) and Ion Series of purified protein. **C)** Expressed protein ligation of TMR-HA peptide and cys-Ava<sup>N</sup>. Representative LCMS (214nm) and Ion Series of purified product.

### Supplemental Fig 6

TMR spliced EGFR mimics recombinant HA-Ava<sup>N</sup> spliced EGFR

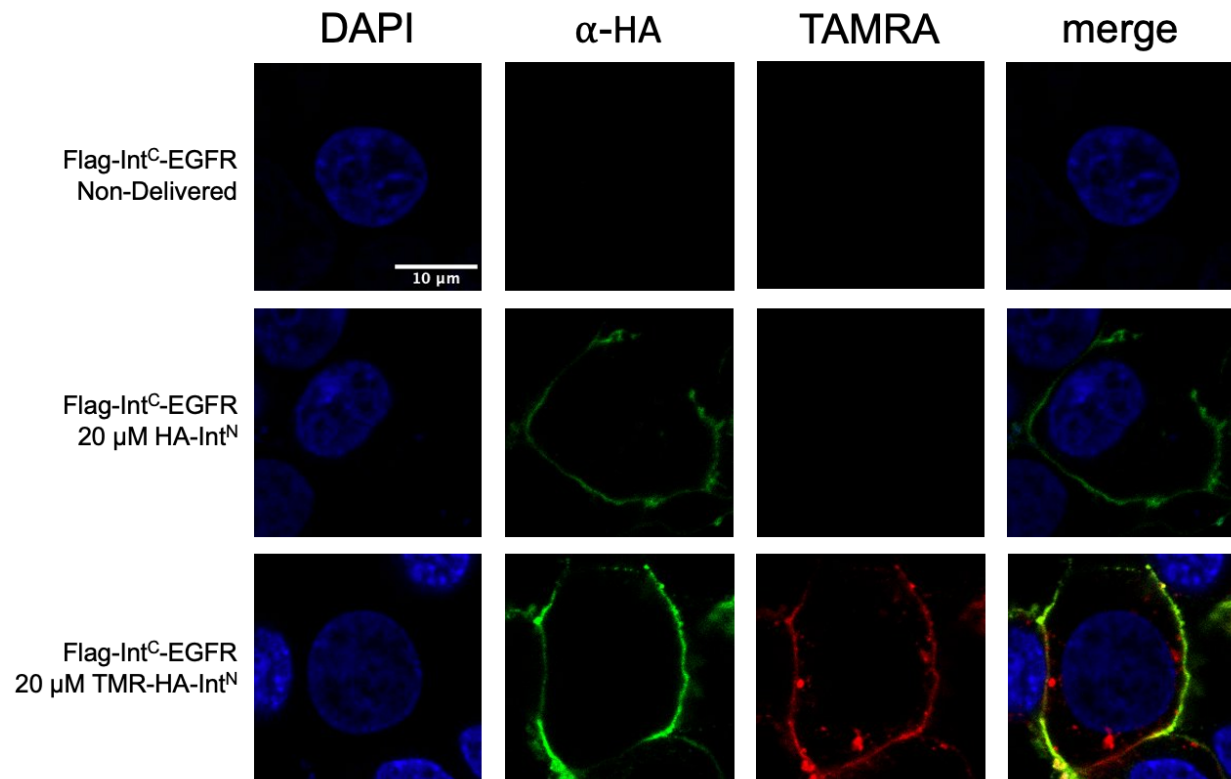

HEK293T cells expressing Flag-Int<sup>C</sup>-EGFR were treated with 20 μM of HA-Ava<sup>N</sup> or TMR-HA-Ava<sup>N</sup> for 60 minutes. Cells were fixed with paraformaldehyde, stained with anti-HA (green), DAPI (blue) and imaged (red-TMR).
